# Supplementary material for: Dielectric switching from a high temperature plastic phase transition in two organic salts with chiral features
Source: Royal Society of Chemistry journal article supplement (doi:10.1039/d1ma01108a), 2021-12-21
Supplement: d1ma01108a1.pdf [file d1ma01108a1.pdf]

## Electronic Supplementary Materials (ESI)

### Dielectric Switch of High Temperature Plastic Phase Transition in Two Organic Salts with Chiral Feature

Tingting Ying, Yanle Huang, Ning Song, Yuhui Tan\*, Yunzhi Tang\*, Zhen Sun, Jiachuang Zhuang,  
Xingxian Dong

\* Faculty of materials Metallurgy and Chemistry, Jiangxi University of Science and  
Technology, Ganzhou 341000, China

#### 1. Synthetic scheme of precursor, compound 1 and compound 2

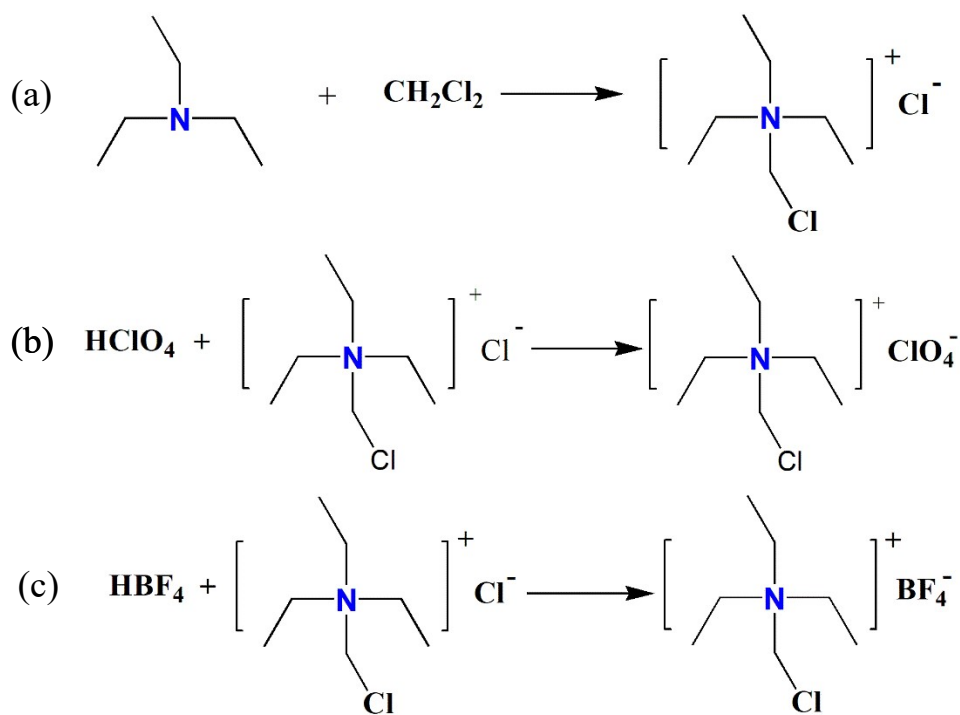

Figure S1. Schematic diagrams of synthesis of precursor(a), compounds 1(b) and 2(c).

#### 2. Infrared spectra of compounds 1 and 2

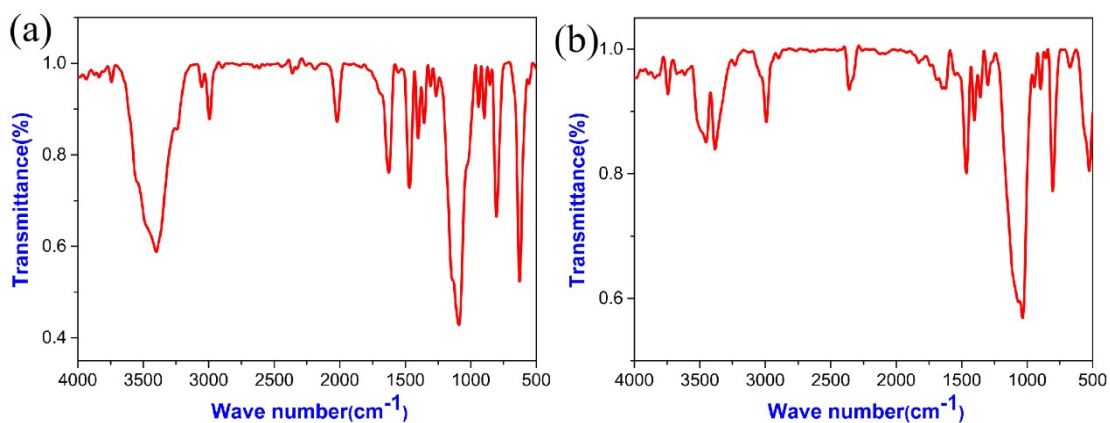

Figure S2. Infrared spectra of compounds 1(a) and 2(b)

### 3. Thermogravimetric analysis (TGA) of compounds 1 and 2

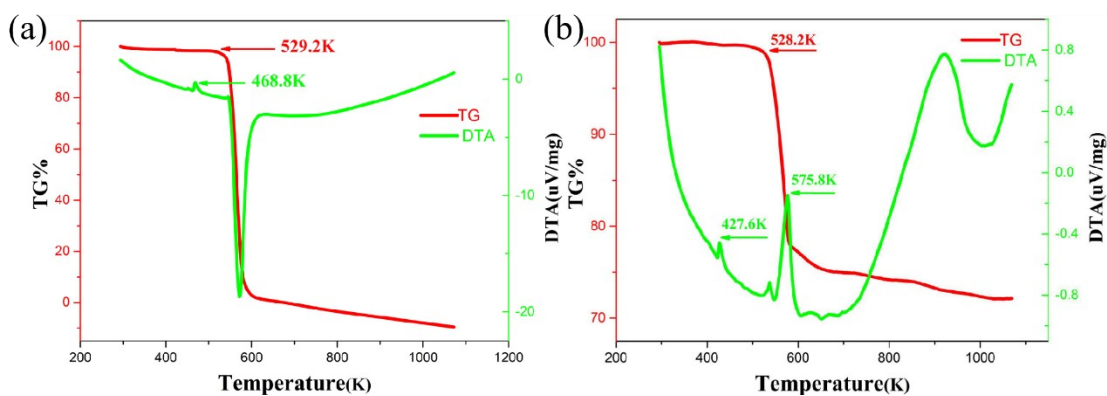

Figure S3. TGA diagram for compounds 1(a) and 2(b)

### 4. I-Phase(a) and II-Phase(b) and III-Phase(c) of compound 2 coordination environment map; II-Phase(d) of compound 2 stacked graph along the C axis.

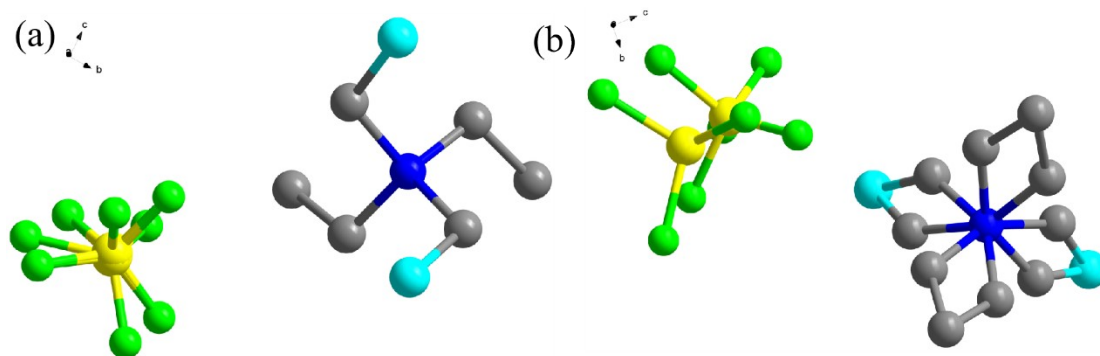

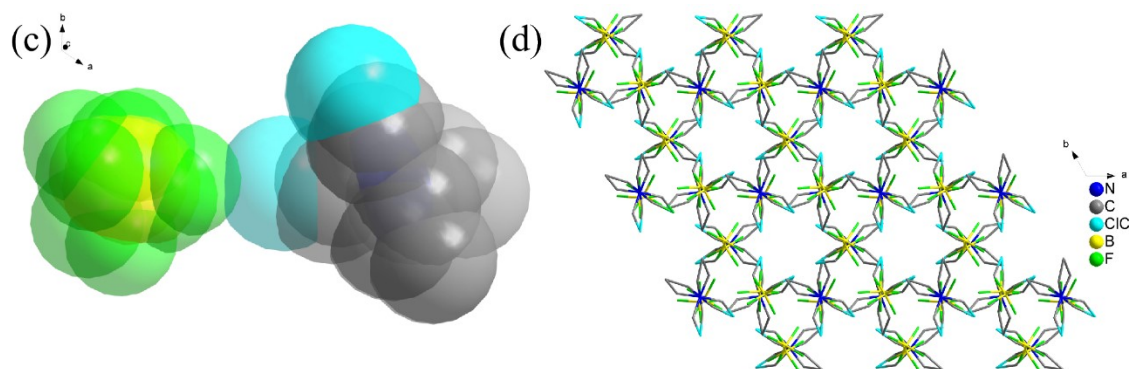

**Figure S4.** I-Phase(a) and II-Phase(b) and III-Phase(c) of compound **2** coordination environment map; II-Phase(d) of compound **1** stacked graph along the C axis.

## 5. Summary of the crystallographic data for crystal of **1** and **2**

Table S1. Summary of the crystallographic data for crystal of **1** and **2**

| compound                                                   | 1-I                                                                | 1-II                                                               | 2-I                                                                | 2-II                                                               |
|------------------------------------------------------------|--------------------------------------------------------------------|--------------------------------------------------------------------|--------------------------------------------------------------------|--------------------------------------------------------------------|
| Empirical formula                                          | C <sub>7</sub> Cl <sub>2</sub> NO <sub>4</sub>                     | C <sub>7</sub> Cl <sub>2</sub> NO <sub>4</sub>                     | BClC <sub>7</sub> F <sub>4</sub> N                                 | BClC <sub>7</sub> F <sub>4</sub> N                                 |
| Formula weight                                             | 232.98                                                             | 232.98                                                             | 220.34                                                             | 220.32                                                             |
| Temperature                                                | 293 K                                                              | 430 K                                                              | 293 K                                                              | 420 K                                                              |
| Crystal system                                             | Trigonal                                                           | Trigonal                                                           | Trigonal                                                           | Trigonal                                                           |
| Space group                                                | <i>P</i> 3 <sub>2</sub> 21                                         | <i>P</i> 3 <sub>1</sub> 21                                         | <i>P</i> 3 <sub>2</sub> 21                                         | <i>P</i> 3 <sub>2</sub> 21                                         |
| <i>a</i> (Å)                                               | 7.3426(3)                                                          | 7.4295(4)                                                          | 7.2791(3)                                                          | 7.3906(6)                                                          |
| <i>b</i> (Å)                                               | 7.3426(3)                                                          | 7.4295(4)                                                          | 7.2791(3)                                                          | 7.3906(6)                                                          |
| <i>c</i> (Å)                                               | 19.3196(10)                                                        | 19.6225(13)                                                        | 19.0645(11)                                                        | 19.390(2)                                                          |
| <i>V</i> (Å <sup>3</sup> )                                 | 902.05(9)                                                          | 940.53(12)                                                         | 874.80(9)                                                          | 917.2(18)                                                          |
| <i>D</i> <sub>calca</sub> /Mg·m <sup>-3</sup>              | 1.287                                                              | 1.234                                                              | 1.255                                                              | 1.197                                                              |
| <i>Z</i>                                                   | 3                                                                  | 3                                                                  | 3                                                                  | 3                                                                  |
| $\mu$ (mm <sup>-1</sup> )                                  | 0.528                                                              | 0.506                                                              | 0.340                                                              | 0.324                                                              |
| GOF                                                        | 1.731                                                              | 1.514                                                              | 1.469                                                              | 3.047                                                              |
| <i>R</i> 1[ <i>I</i> > 2 $\sigma$ ( <i>I</i> )]            | <i>R</i> <sub>1</sub> = 0.1301,<br><i>wR</i> <sub>2</sub> = 0.4029 | <i>R</i> <sub>1</sub> = 0.1548,<br><i>wR</i> <sub>2</sub> = 0.3959 | <i>R</i> <sub>1</sub> = 0.1222,<br><i>wR</i> <sub>2</sub> = 0.3613 | <i>R</i> <sub>1</sub> = 0.3927,<br><i>wR</i> <sub>2</sub> = 0.7417 |
| <i>wR</i> 2 (all data)                                     | <i>R</i> <sub>1</sub> = 0.1474,<br><i>wR</i> <sub>2</sub> = 0.4134 | <i>R</i> <sub>1</sub> = 0.1947,<br><i>wR</i> <sub>2</sub> = 0.4295 | <i>R</i> <sub>1</sub> = 0.1455,<br><i>wR</i> <sub>2</sub> = 0.3828 | <i>R</i> <sub>1</sub> = 0.4516,<br><i>wR</i> <sub>2</sub> = 0.7710 |
| $\Delta\rho_{\max}/\Delta\rho_{\min}$ (e Å <sup>-3</sup> ) | 0.65 /-1.01                                                        | 0.65 /-0.75                                                        | 0.64 /-0.37                                                        | 1.76/-0.97                                                         |

## 6. Calculation of $\Delta S$ and N for compounds **1** and **2**

### (1) Compound **1**:

In the I/II phase cooling cycle mode:

$$\begin{aligned}
& \Delta S_1 \\
& = R \ln N_1 = \int_{T_2}^{T_1} \frac{Q}{T} dT \approx \frac{\Delta H}{T_c} = \frac{3.371 \text{ J} \cdot \text{g}^{-1} \cdot \text{mol}^{-1} \times 249.6 \text{ K}}{397.6 \text{ K}} \\
& = 2.120 \text{ J} \cdot \text{mol}^{-1} \cdot \text{K}^{-1} \\
N_1 & = \exp\left(\frac{\Delta S_1}{R}\right) = \exp\left(\frac{2.12 \text{ J} \cdot \text{mol}^{-1} \cdot \text{K}^{-1}}{8.314 \text{ J} \cdot \text{mol}^{-1} \cdot \text{K}^{-1}}\right) = 1.290
\end{aligned}$$

In the I/II phase heating cycle mode:

$$\begin{aligned}
& \Delta S_2 \\
& = R \ln N_2 = \int_{T_2}^{T_1} \frac{Q}{T} dT \approx \frac{\Delta H}{T_c} = \frac{3.507 \text{ J} \cdot \text{g}^{-1} \cdot \text{mol}^{-1} \times 249.6 \text{ K}}{401.2 \text{ K}} \\
& = 2.180 \text{ J} \cdot \text{mol}^{-1} \cdot \text{K}^{-1} \\
N_2 & = \exp\left(\frac{\Delta S_2}{R}\right) = \exp\left(\frac{2.180 \text{ J} \cdot \text{mol}^{-1} \cdot \text{K}^{-1}}{8.314 \text{ J} \cdot \text{mol}^{-1} \cdot \text{K}^{-1}}\right) = 1.300
\end{aligned}$$

In the II/ III phase cooling cycle mode:

$$\begin{aligned}
& \Delta S_3 \\
& = R \ln N_3 = \int_{T_2}^{T_1} \frac{Q}{T} dT \approx \frac{\Delta H}{T_c} = \frac{22.83 \text{ J} \cdot \text{g}^{-1} \cdot \text{mol}^{-1} \times 249.6 \text{ K}}{417.7 \text{ K}} \\
& = 13.66 \text{ J} \cdot \text{mol}^{-1} \cdot \text{K}^{-1} \\
N_3 & = \exp\left(\frac{\Delta S_3}{R}\right) = \exp\left(\frac{13.66 \text{ J} \cdot \text{mol}^{-1} \cdot \text{K}^{-1}}{8.314 \text{ J} \cdot \text{mol}^{-1} \cdot \text{K}^{-1}}\right) = 5.160
\end{aligned}$$

In the II/ III phase heating cycle mode:

$$\begin{aligned}
& \Delta S_4 \\
& = R \ln N_4 = \int_{T_2}^{T_1} \frac{Q}{T} dT \approx \frac{\Delta H}{T_c} = \frac{21.42 \text{ J} \cdot \text{g}^{-1} \cdot \text{mol}^{-1} \times 249.6 \text{ K}}{455.2 \text{ K}} \\
& = 11.76 \text{ J} \cdot \text{mol}^{-1} \cdot \text{K}^{-1}
\end{aligned}$$

$$N_4 = \exp\left(\frac{\Delta S_4}{R}\right) = \exp\left(\frac{11.76 \text{ J} \cdot \text{mol}^{-1} \cdot \text{K}^{-1}}{8.314 \text{ J} \cdot \text{mol}^{-1} \cdot \text{K}^{-1}}\right) = 4.110$$

**(2) Compound 2:**

In the I/II phase cooling cycle mode:

$$\begin{aligned} \Delta S_5 &= R \ln N_5 = \int_{T_2}^{T_1} \frac{Q}{T} dT \approx \frac{\Delta H}{T_c} = \frac{3.544 \text{ J} \cdot \text{g}^{-1} \cdot \text{mol}^{-1} \times 272.4 \text{ K}}{401.4 \text{ K}} \\ &= 2.410 \text{ J} \cdot \text{mol}^{-1} \cdot \text{K}^{-1} \end{aligned}$$

$$N_5 = \exp\left(\frac{\Delta S_5}{R}\right) = \exp\left(\frac{2.410 \text{ J} \cdot \text{mol}^{-1} \cdot \text{K}^{-1}}{8.314 \text{ J} \cdot \text{mol}^{-1} \cdot \text{K}^{-1}}\right) = 1.340$$

In the I/II phase heating cycle mode:

$$\begin{aligned} \Delta S_6 &= R \ln N_6 = \int_{T_2}^{T_1} \frac{Q}{T} dT \approx \frac{\Delta H}{T_c} = \frac{2.997 \text{ J} \cdot \text{g}^{-1} \cdot \text{mol}^{-1} \times 272.4 \text{ K}}{407.4 \text{ K}} \\ &= 2.010 \text{ J} \cdot \text{mol}^{-1} \cdot \text{K}^{-1} \end{aligned}$$

$$N_6 = \exp\left(\frac{\Delta S_6}{R}\right) = \exp\left(\frac{2.010 \text{ J} \cdot \text{mol}^{-1} \cdot \text{K}^{-1}}{8.314 \text{ J} \cdot \text{mol}^{-1} \cdot \text{K}^{-1}}\right) = 1.270$$

In the II/ III phase cooling cycle mode:

$$\begin{aligned} \Delta S_7 &= R \ln N_7 = \int_{T_2}^{T_1} \frac{Q}{T} dT \approx \frac{\Delta H}{T_c} = \frac{53.79 \text{ J} \cdot \text{g}^{-1} \cdot \text{mol}^{-1} \times 272.4 \text{ K}}{417.7 \text{ K}} \\ &= 35.13 \text{ J} \cdot \text{mol}^{-1} \cdot \text{K}^{-1} \end{aligned}$$

$$N_7 = \exp\left(\frac{\Delta S_7}{R}\right) = \exp\left(\frac{35.13 \text{ J} \cdot \text{mol}^{-1} \cdot \text{K}^{-1}}{8.314 \text{ J} \cdot \text{mol}^{-1} \cdot \text{K}^{-1}}\right) = 68.40$$

In the II/ III phase heating cycle mode:

$$\Delta S_8$$

$$\begin{aligned} &= R \ln N_8 = \int_{T_2}^{T_1} \frac{Q}{T} dT \approx \frac{\Delta H}{T_c} = \frac{55.08 \text{ J} \cdot \text{g}^{-1} \cdot \text{mol}^{-1} \times 27}{432.8 \text{ K}} \\ &= 34.71 \text{ J} \cdot \text{mol}^{-1} \cdot \text{K}^{-1} \end{aligned}$$

$$N_8 = \exp\left(\frac{\Delta S_8}{R}\right) = \exp\left(\frac{34.71 \text{ J} \cdot \text{mol}^{-1} \cdot \text{K}^{-1}}{8.314 \text{ J} \cdot \text{mol}^{-1} \cdot \text{K}^{-1}}\right) = 65.10$$
